# Supplementary material for: Profluorescent substrates for the screening of olefin metathesis catalysts
Source: publisher site journal article supplement (doi:10.3762/bjoc.11.203), 2015-10-12

# Supporting Information

for

## Profluorescent substrates for the screening of olefin metathesis catalysts

Raphael Reuter and Thomas R. Ward\*

Address: Department of Chemistry, University of Basel, Spitalstrasse 51, CH-4056  
Basel, Switzerland

Email: Thomas R. Ward - [thomas.ward@unibas.ch](mailto:thomas.ward@unibas.ch)

\* Corresponding author

### NMR spectra of synthesized compounds

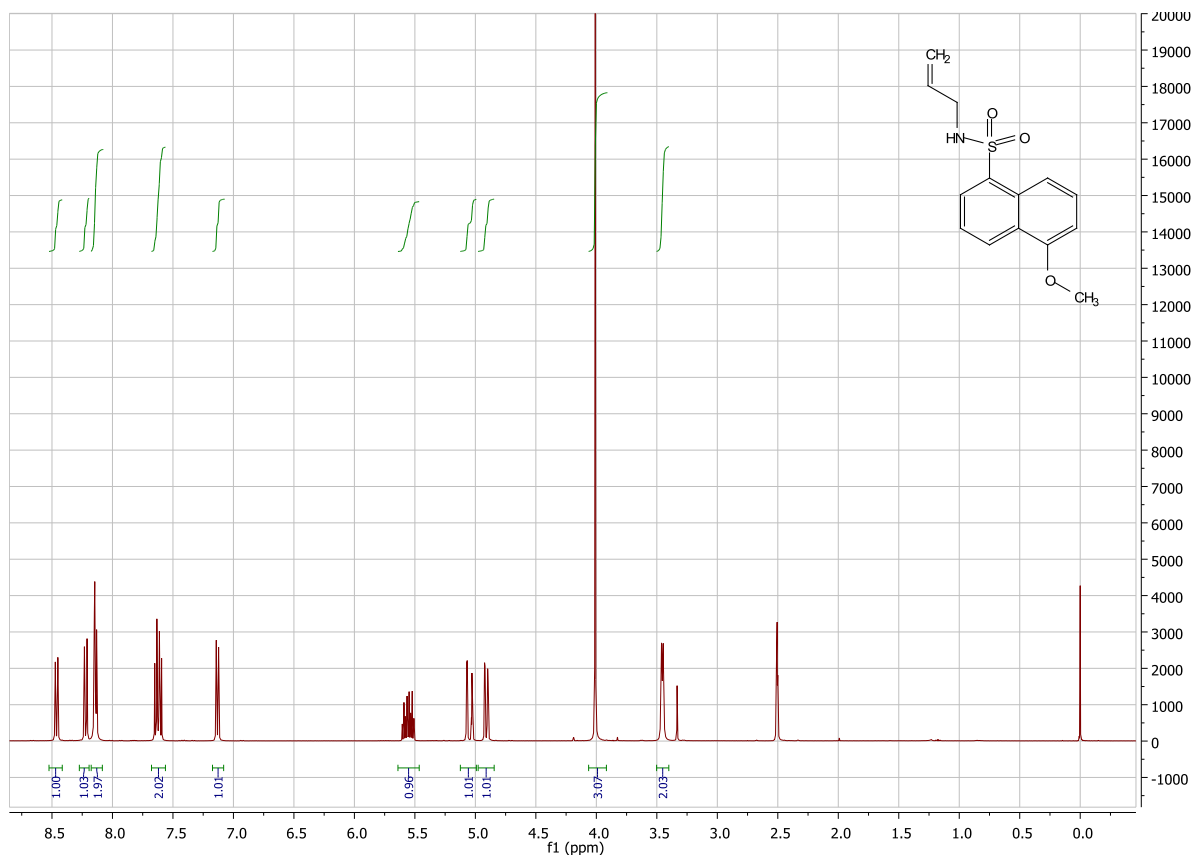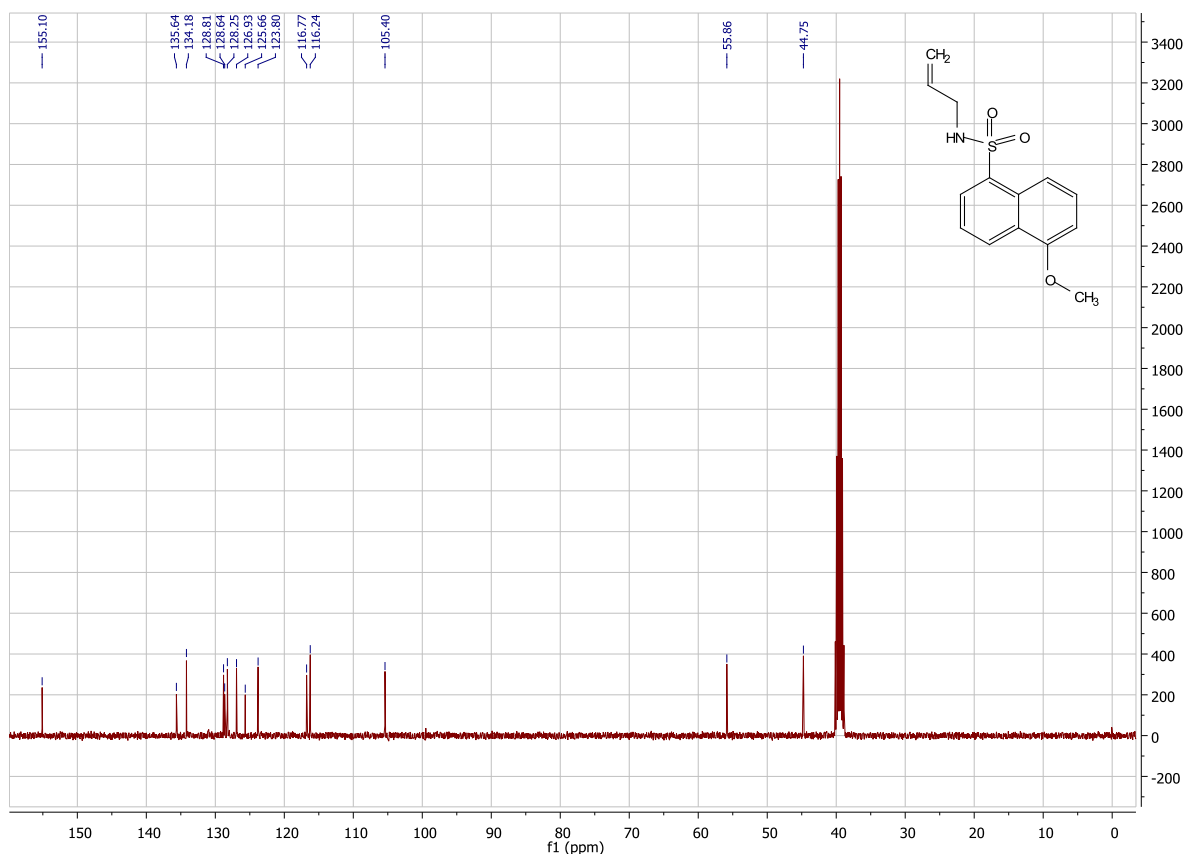

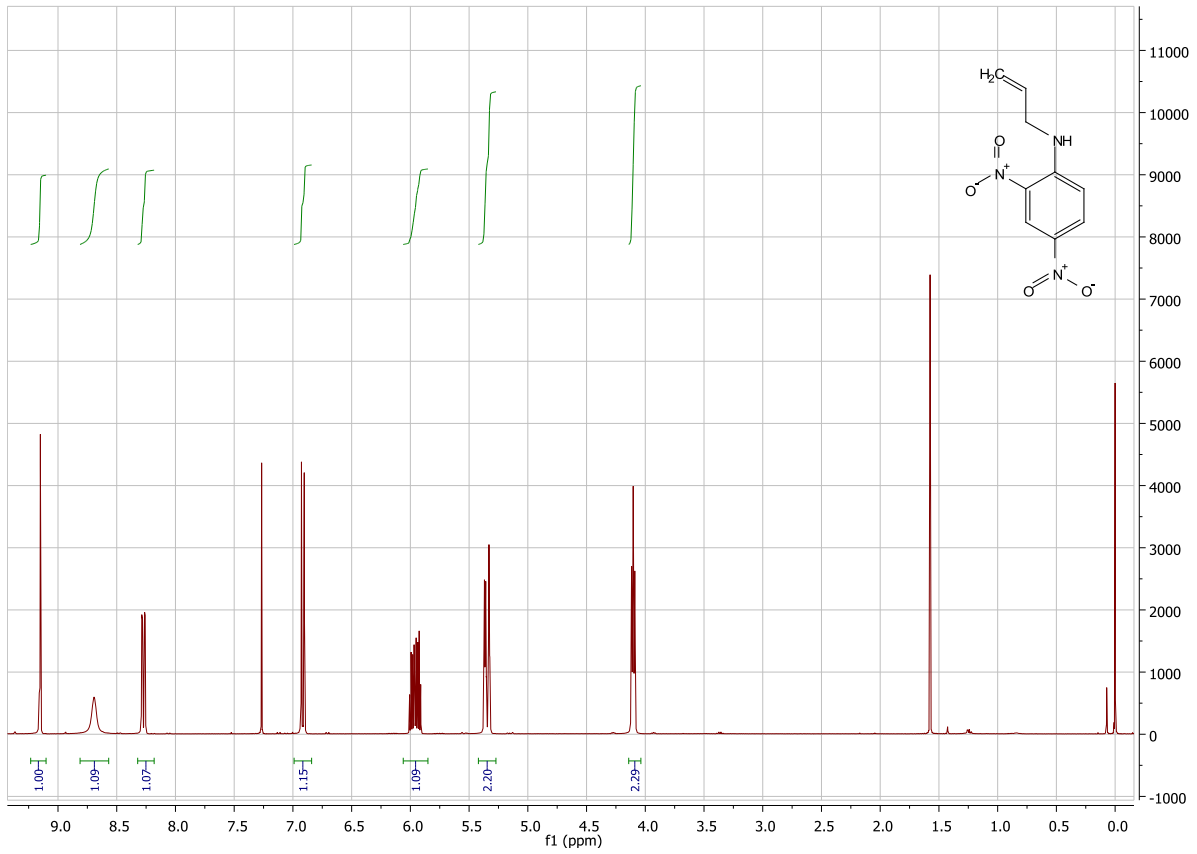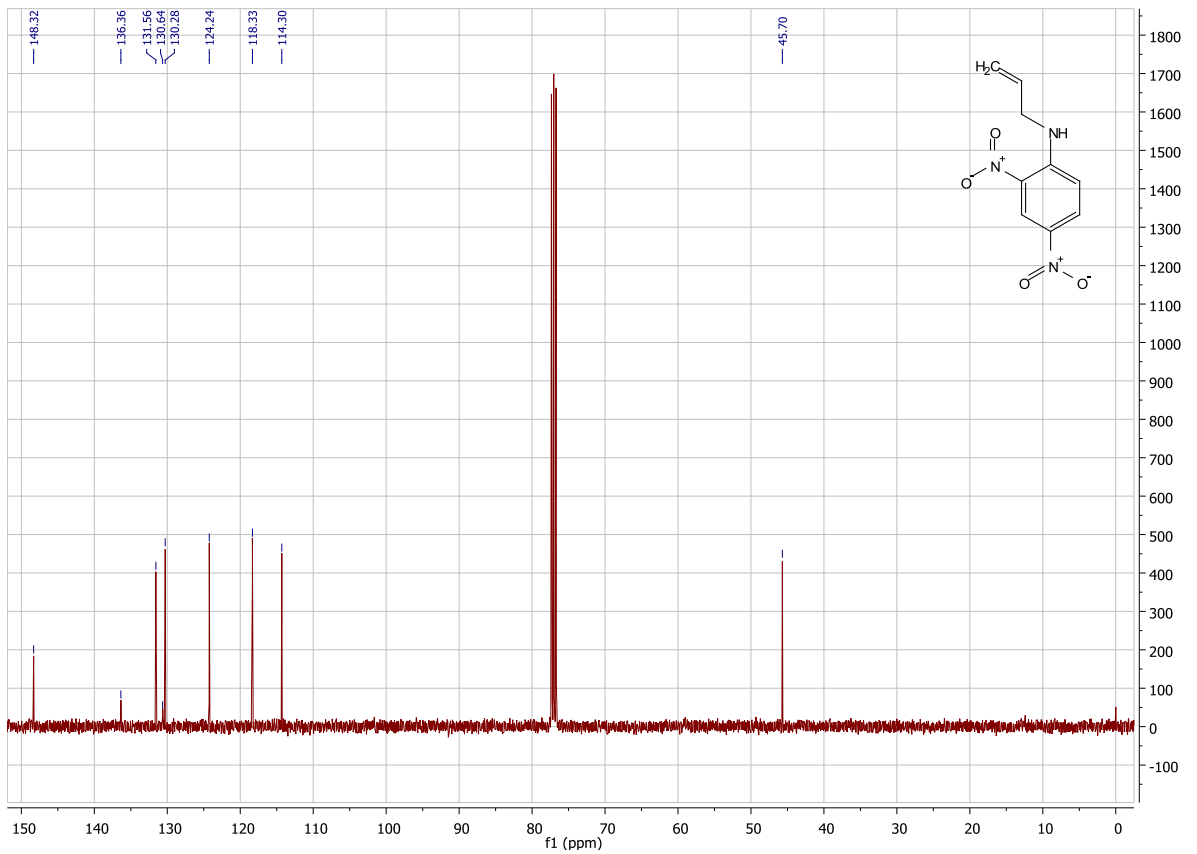

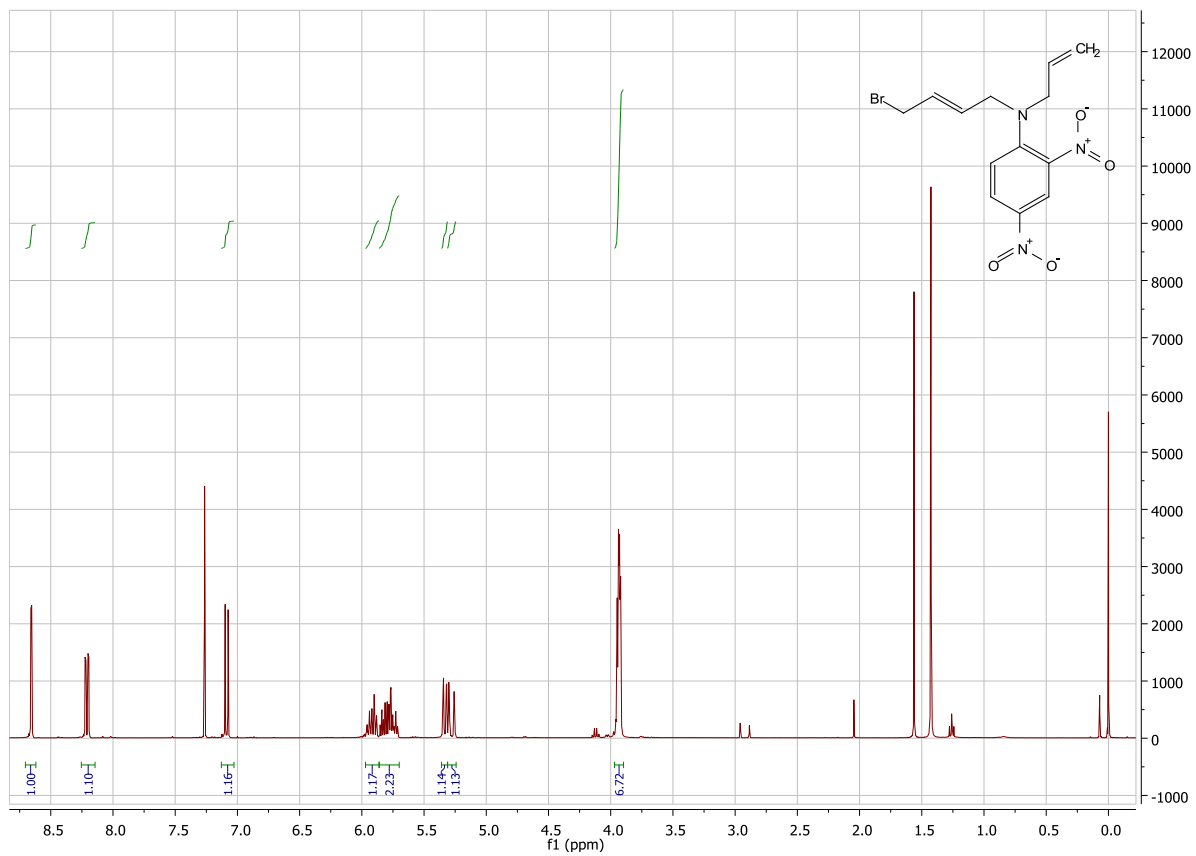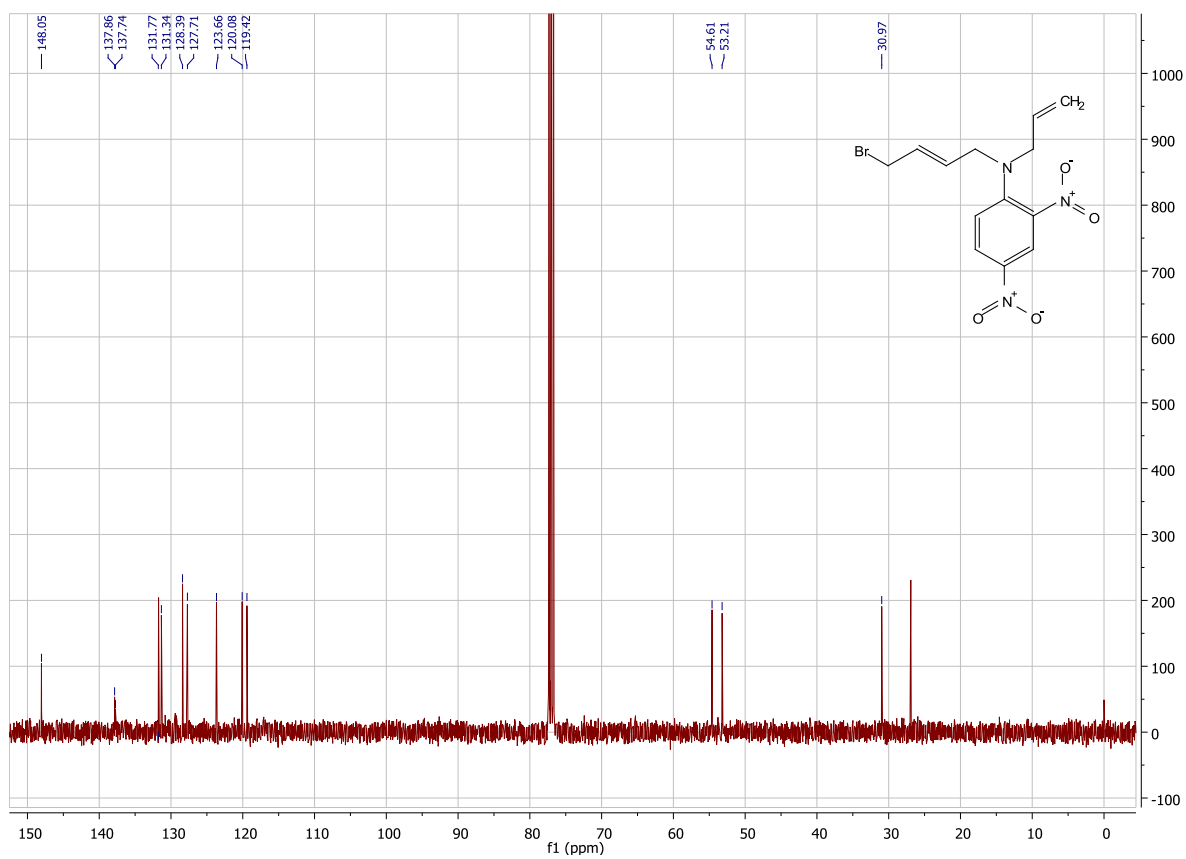

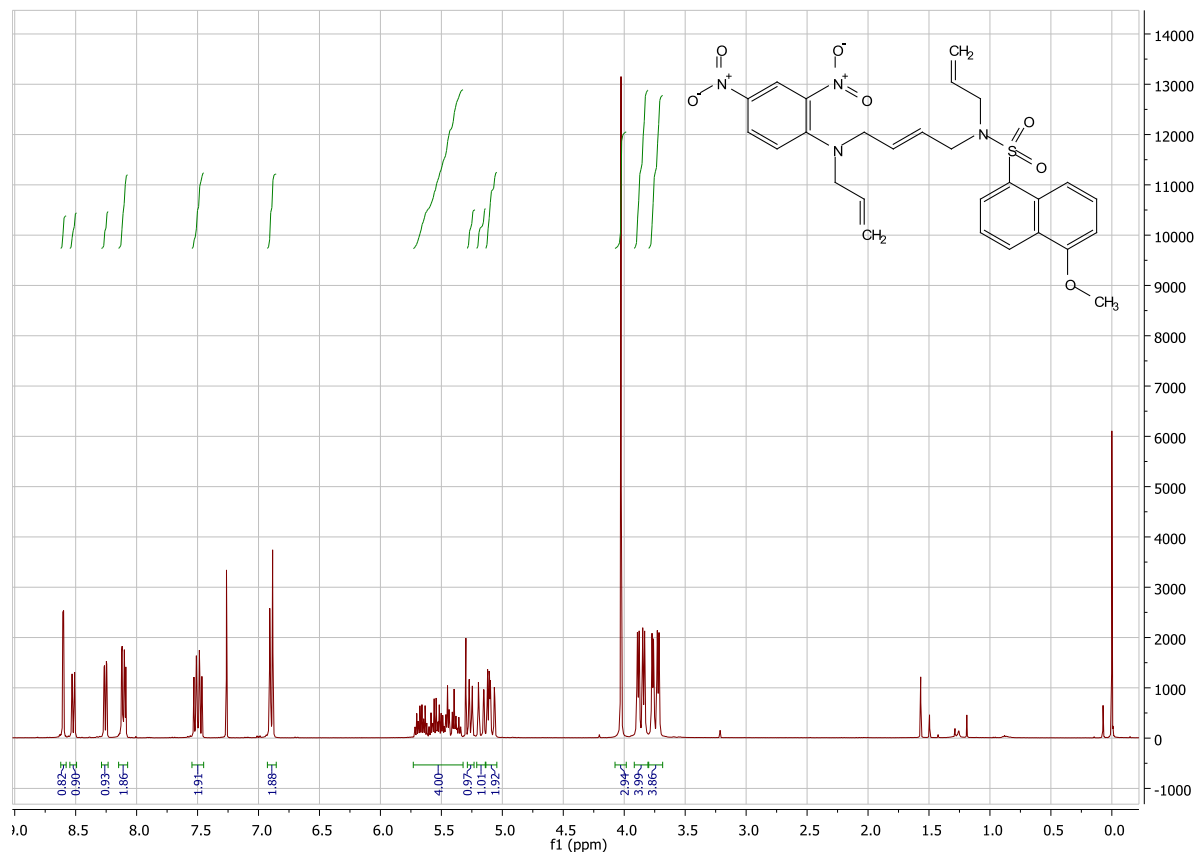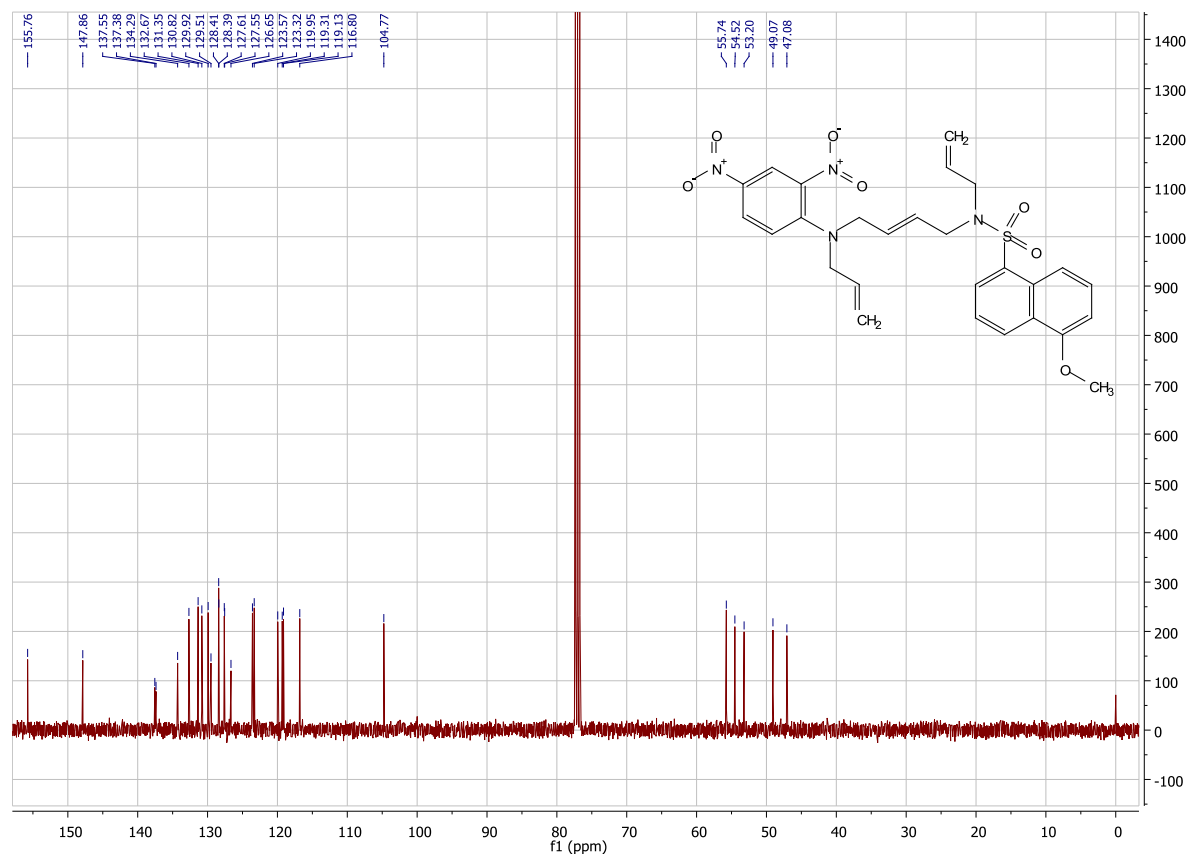

Supplement: Additional file 1 [file 1860-5397-11-203-S1.pdf]
